# Supplementary material
Source: PubMed Central journal article supplement (PMC7485388)
Supplement: NIHMS1619805-supplement-Supporting_Information.pdf [file NIHMS1619805-supplement-Supporting_Information.pdf]

Supporting Information for:

## **A Chemical-Genetic Approach to Generate Selective Covalent Inhibitors of Protein Kinases**

Alvin Kung,<sup>†</sup> Marianne Schimpl,<sup>#</sup> Arunika Ekanayake<sup>†</sup>, Ying-Chu Chen,<sup>†</sup> Ross Overman,<sup>∞</sup> and Chao Zhang<sup>\*,†,||</sup>

<sup>†</sup>Department of Chemistry and Loker Hydrocarbon Research Institute, <sup>||</sup>Department of Biological Sciences, University of Southern California, Los Angeles, California 90089, United States

<sup>#</sup>Discovery Sciences, Innovative Medicines and Early Development Biotech Unit, AstraZeneca, Building 310, Cambridge Science Park, Milton Road, Cambridge, CB4 0WG, UK

<sup>∞</sup>Discovery Sciences, Innovative Medicines and Early Development Biotech Unit, AstraZeneca, Alderley Park, Macclesfield, Cheshire, SK10 4TG, UK

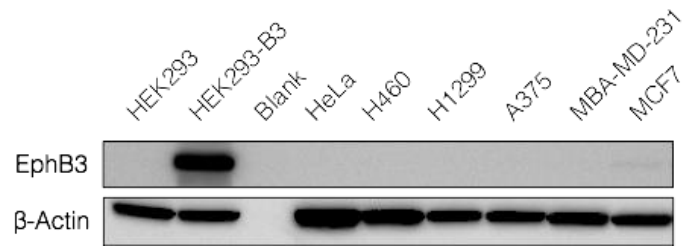

**Figure S1.** Screening of a number of cell lines using western blot fails to detect expression of endogenous EphB3 protein. HEK293-B3 cells that stably express EphB3 were used as a positive control.

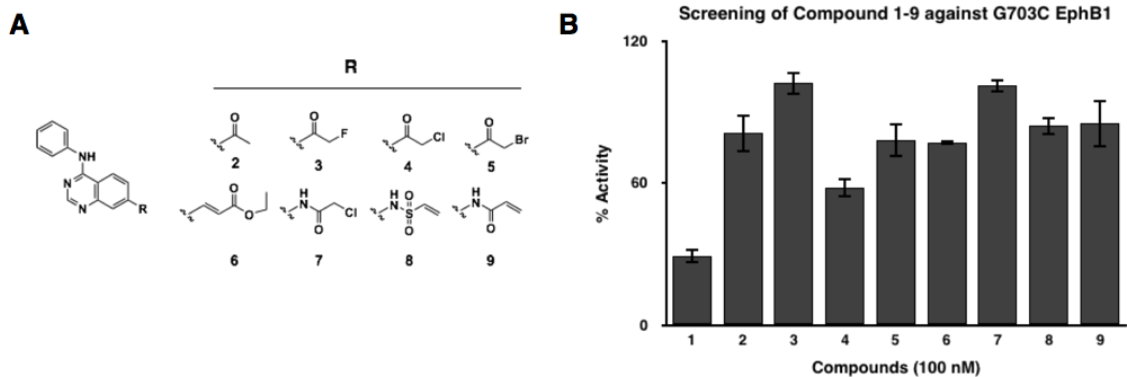

**Figure S2.** Screening of a panel of electrophilic inhibitors for inhibition against G703C EphB1. (A) Structures of quinazolines **2-9**, which contain various electrophiles at position 7. (B) Compounds **1-9** were screened at 100 nM for inhibition against G703C EphB1 *in vitro*. Compound **1** caused the most potent inhibition among the nine compounds. The kinase activity was measured in duplicates using the disk assay and normalized to that of the control (DMSO).

**Table S1.** Percentage inhibition of a panel of 249 kinases by 100 nM of compound 1

|                 |    |               |     |                         |     |                  |     |               |     |       |     |
|-----------------|----|---------------|-----|-------------------------|-----|------------------|-----|---------------|-----|-------|-----|
| ABL1            | 54 | CLK2          | -5  | GSK3 $\beta$            | 4   | MEK3             | 10  | PIM-1-KINASE  | 12  | SPHK1 | -2  |
| AKT1            | 0  | CLK3          | 2   | HASPIN                  | -1  | MELK             | 1   | PIM2          | 1   | SPHK2 | 18  |
| AKT2            | 1  | CRAF          | 6   | HCK                     | 23  | MER              | -24 | PIM3          | 0   | SRC   | 18  |
| AKT3            | 1  | CSK           | 8   | HIPK1                   | -4  | MET              | 0   | PKA           | -1  | SRMS  | -4  |
| ALK             | 0  | DAPK1         | -1  | HIPK2                   | -1  | MKNK1            | 1   | PKACB         | -4  | SRPK1 | -1  |
| AMP-A1B1G1      | -2 | DAPK3         | 0   | HIPK3                   | -1  | MNK2             | 0   | PKC $\alpha$  | 5   | SRPK2 | 2   |
| AMP-A2B1G1      | 1  | DCAMKL2       | 1   | HIPK4                   | 1   | MRCK $\alpha$    | 0   | PKC $\beta$ 1 | 2   | STK16 | 14  |
| ARG             | 27 | DDR1          | 20  | IGF1R                   | 2   | MRCK $\beta$     | 0   | PKC $\beta$ 2 | 6   | STK25 | -5  |
| ARK5            | 5  | DDR2          | 3   | IKK $\alpha$            | 1   | MSK1             | 4   | PKC $\eta$    | 8   | SYK   | -14 |
| AURORA-A        | 6  | DYRK1A        | -5  | IKK $\beta$             | 4   | MSK2             | 3   | PKC $\gamma$  | 13  | TAK1  | 0   |
| AURORA-B        | 8  | DYRK1B        | 0   | IKK $\epsilon$          | 4   | MSSK1            | 4   | PKC $\iota$   | 1   | TAOK2 | 1   |
| AURORA-C        | 4  | DYRK2         | 5   | INSR                    | 1   | MST1             | 1   | PKC $\theta$  | 5   | TAOK3 | 2   |
| AXL             | 2  | DYRK3         | 1   | IRAK1                   | 2   | MST2             | 3   | PKC $\zeta$   | -7  | TBK1  | 0   |
| BLK             | 7  | DYRK4         | -6  | IRAK4                   | 1   | MST3             | 2   | PKN1          | 0   | TEC   | -22 |
| BMX             | -2 | EGFR          | 51  | IRR                     | -14 | MST4             | -3  | PKN2          | -2  | TIE2  | 9   |
| BRAF            | 16 | EPH-A1        | 51  | ITK                     | -15 | MUSK             | 1   | PLK1          | 4   | TNIK  | 1   |
| BRK             | 38 | EPH-A2        | 13  | JAK1                    | 1   | NDR2             | 1   | PLK3          | 0   | TNK1  | -1  |
| BRSK1           | 1  | EPH-A3        | 15  | JAK2                    | 1   | NDRG1            | -5  | PLK4          | -2  | TNK2  | -6  |
| BRSK2           | -1 | EPH-A4        | 36  | JAK3                    | -2  | NEK1             | -5  | PRAK          | -18 | TRKA  | 1   |
| BTK             | 7  | EPH-A5        | 17  | JNK1                    | -3  | NEK2             | 0   | PRKACA        | 2   | TRKB  | 1   |
| CAMK1A          | 1  | EPH-A8        | 11  | JNK2                    | -8  | NEK6             | -1  | PRKD1         | 5   | TRKC  | -7  |
| CAMK1D          | 8  | EPH-B1        | 12  | JNK3                    | -7  | NEK7             | 0   | PRKD2         | 3   | TSSK1 | -2  |
| CAMK2A          | 5  | EPH-B2        | 36  | KDR                     | 50  | NEK9             | 1   | PRKD3         | -2  | TSSK2 | 1   |
| CAMK2B          | 0  | EPH-B3        | 98  | KIT                     | 11  | p38 $\alpha$     | 5   | PRKG1         | 2   | TTK   | 1   |
| CAMK2D          | -1 | EPH-B4        | 6   | LATS1                   | 6   | p38 $\beta$      | 3   | PRKG2         | 5   | TXK   | -5  |
| CAMK2G          | 5  | ERB-B2        | -11 | LATS2                   | 2   | p38 $\delta$     | 1   | PRKX          | 4   | TYK2  | 0   |
| CAMK4           | 5  | ERB-B4        | 10  | LCK                     | 2   | p38 $\gamma$     | 0   | PTK5          | 3   | TYRO3 | 2   |
| CDK1            | -2 | FAK           | 17  | LOK                     | 2   | P70S6K1          | 1   | PYK2          | 4   | YES   | 27  |
| CDK2            | -1 | FER           | -3  | LRRK2 <sup>G2019S</sup> | 3   | P70S6K2          | -16 | RET           | 67  | ZAP70 | 0   |
| CDK2-CYCLINE    | 0  | FES           | 6   | LTK                     | -9  | PAK1             | 2   | RIPK2         | 77  |       |     |
| CDK3-CYCLINE    | 1  | FGFR1         | 3   | LYNA                    | 1   | PAK2             | 0   | ROCK1         | -3  |       |     |
| CDK4-CYCLIND    | 3  | FGFR2         | 3   | LYNB                    | 5   | PAK2             | 0   | ROCK1         | -3  |       |     |
| CDK5            | -1 | FGFR2         | 3   | LYNB                    | 5   | PAK4             | 0   | RON           | 1   |       |     |
| CDK5-P25        | 3  | FGFR4         | 0   | MAP4K4                  | 3   | PAK5             | 0   | ROS           | 2   |       |     |
| CDK5-P25        | 3  | FGR           | 8   | MAP4K5                  | -9  | PAK6             | 1   | RSK1          | 2   |       |     |
| CDK9-CYCLINT1   | -3 | FLT-1         | 33  | MAPK1                   | 4   | PAR-1B- $\alpha$ | 2   | RSK2          | 1   |       |     |
| CHEK1           | 2  | FLT-3         | 2   | MAPK3                   | 1   | PASK             | 1   | RSK3          | 1   |       |     |
| CHEK2           | 2  | FLT-4         | 28  | MAPKAPK-2               | 1   | PDGFR $\alpha$   | 6   | RSK4          | -1  |       |     |
| CK1             | 6  | FMS           | 10  | MAPKAPK-3               | 3   | PDGFR $\beta$    | 4   | SGK1          | -2  |       |     |
| CK1- $\epsilon$ | 4  | FRAP1         | -5  | MARK1                   | 2   | PDK1             | 11  | SGK2          | -2  |       |     |
| CK1- $\gamma$ 1 | -7 | FYN           | -1  | MARK3                   | 3   | PERK             | 1   | SGK3          | 0   |       |     |
| CK1- $\gamma$ 2 | 13 | GRK6          | 6   | MARK4                   | -1  | PHK- $\gamma$ 1  | 11  | SIK           | 1   |       |     |
| CK1- $\gamma$ 3 | -7 | GRK7          | -4  | MEK1                    | 2   | PHK- $\gamma$ 2  | -4  | SLK           | 0   |       |     |
| CLK1            | 2  | GSK3 $\alpha$ | 6   | MEK2                    | 1   | PI3K $\alpha$    | 37  | SNF1LK2       | 1   |       |     |

**Table S2.** IC<sub>50</sub> values of different 7-chloroacetamidoquinazolines against variants of ABL and FGFR4. All IC<sub>50</sub> values were determined using the disk kinase assay.

| Compound  | ABL     |       | Fold selectivity |
|-----------|---------|-------|------------------|
|           | WT      | G321C |                  |
| <b>1</b>  | 690     | 140   | 4.9              |
| <b>4</b>  | >10,000 | 1223  | >8.0             |
| <b>10</b> | 530     | 14    | 37               |

  

| Compound  | FGFR4   |       | Fold selectivity |
|-----------|---------|-------|------------------|
|           | WT      | G556C |                  |
| <b>1</b>  | 1,700   | 77    | 22               |
| <b>4</b>  | >10,000 | 522   | 19               |
| <b>10</b> | >10,000 | 163   | >61              |

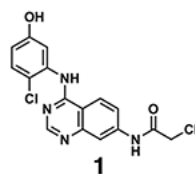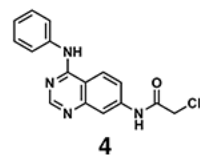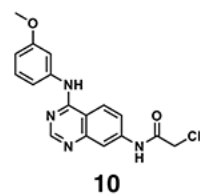

**Table S3.** Crystallographic data collection and refinement statistics.

|                                     | EphB1                | EphB1 G703C         |
|-------------------------------------|----------------------|---------------------|
|                                     | Compound 1           | Compound 1          |
| PDB entry                           | 5MJA                 | 5MJB                |
| <b>Data collection</b>              |                      |                     |
| Space group                         | <i>P</i> 31 2 1      | <i>P</i> 31 2 1     |
| Cell dimensions                     |                      |                     |
| <i>a</i> , <i>b</i> , <i>c</i> (Å)  | 102.1, 102.1, 157.14 | 102.2, 102.2, 157.6 |
| $\alpha$ , $\beta$ , $\gamma$ (°)   | 90, 90, 120          | 90, 90, 120         |
| Resolution (Å)                      | 2.14 (2.20—2.14)     | 2.23 (2.29—2.23)    |
| $R_{\text{merge}}$                  | 0.108 (2.164)        | 0.106 (1.707)       |
| $I/\sigma I$                        | 16.2 (1.5)           | 10.2 (1.6)          |
| CC <sub>1/2</sub>                   | 1.000 (0.620)        | 0.997 (0.622)       |
| Completeness (%)                    | 100.0 (100.0)        | 100.0 (100.0)       |
| Multiplicity                        | 19.7 (19.3)          | 9.7 (10.1)          |
| <b>Refinement</b>                   |                      |                     |
| Resolution (Å)                      | 76.89—2.14           | 58.84—2.23          |
| No. reflections                     | 1035318 (74250)      | 454865 (34943)      |
| No unique reflections               | 52668 (3844)         | 47109 (3466)        |
| $R_{\text{work}} / R_{\text{free}}$ | 0.200 / 0.236        | 0.199/0.214         |
| R.m.s deviations                    |                      |                     |
| Bond lengths (Å)                    | 0.010                | 0.010               |
| Bond angles (°)                     | 1.04                 | 1.05                |

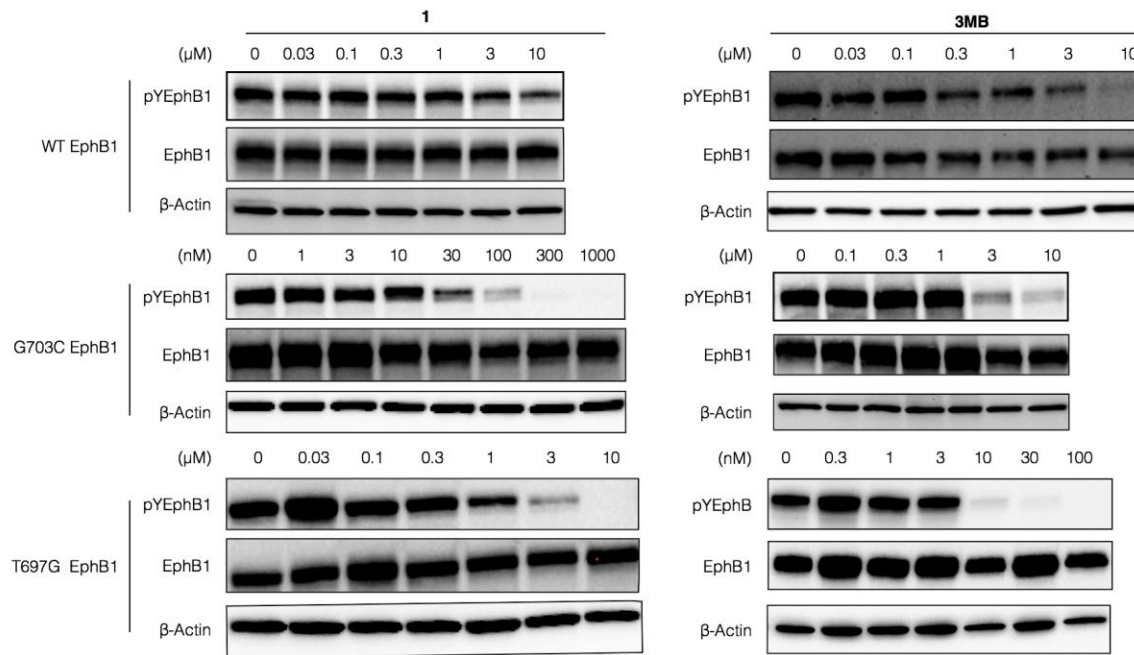

**Figure S3.** Inhibition of EphB1 variants by compound **1** and 3MB-PP1 in cells. Cell lysates were resolved by SDS-PAGE, transferred to nitrocellulose membrane, and immunoblotted with different antibodies as indicated.

## Plasmid construction

All constructs for bacterial expression and transient transfection were prepared by using standard molecular cloning techniques while all retroviral constructs were generated using the Gateway system (Life Technologies).<sup>1</sup> All mutations were generated by standard QuikChange Lighting Site-directed Mutagenesis protocol (Agilent). Details on cloning information and sequence will be made available upon request. EphB3 and EphB1 catalytic domain were created as described previously.<sup>2</sup>

## FGFR4 and Abl kinase assays

FGFR4 and Abl kinase activity were determined following the same protocols as EphB1 except that different peptide substrates were used. Poly (4:1 Glu, Tyr) was used as the substrate in FGFR4 kinase assays and Abl-tide (EAIYAAPFAKKK) was used for Abl.<sup>3,4</sup>

## Generation of stable cell line

Briefly, AmphoPack-293 cells (Clontech) were cultured in 10% FBS DMEM under 37 °C and 5% CO<sub>2</sub> conditions. The cells were seeded at  $4.0 \times 10^6$  and transfected after 16 hours with retroviral expression vectors by conventional calcium phosphate procedures. At 24 hours post-transfection, polybrene (4 mg/mL) was added, and the medium was filtered through 0.45  $\mu$ m syringe filters (cellulose, VWR) and subsequently used to infect HEK293 cells. This process was repeated every 8 hours for 2 days. After viral infection, the cells were cultured in 10% FBS/DMEM for 8 hours followed by selection with G418 at 400  $\mu$ g/mL or puromycin 4  $\mu$ g/mL (Calbiochem) until control plate shows no sign of viable cells.

## Chemical Synthesis

Compounds **1-9** were synthesized as previously described.<sup>2</sup> Compound **10** (2-chloro-*N*-(4-((3-methoxyphenyl)amino)quinazolin-7-yl)acetamide) was synthesized as in a similar manner as described below.

To a solution of *N*<sup>4</sup>-(3-methoxyphenyl)quinazoline-4,7-diamine (100 mg, 0.38 mmol) in 1M NaOH and acetonitrile (NaOH/ACN = 1:1, 2 ml) was added 2-chloroacetyl chloride (85 mg, 0.75 mmol). Then the reaction mixture was stirred at 0 °C for about 0.5 h. Then the reaction mixture was diluted by saturated aqueous NaHCO<sub>3</sub> solution and extracted by EtOAc three times. The combined organic phases were washed with brine and dried over anhydrous sodium sulfate, concentrated and purified by silica gel chromatography



(2–5% MeOH gradient in CH<sub>2</sub>Cl<sub>2</sub>) to afford the desired compound as a pale yellow solid (40 mg, 31% yield). <sup>1</sup>H NMR (500 MHz, DMSO-*d*<sub>6</sub>) δ 10.74 (s, 1H), 9.66 (s, 1H), 8.56 (s, 1H), 8.51 (d, *J* = 9.1 Hz, 1H), 8.12 (d, *J* = 2.1 Hz, 1H), 7.73 (dd, *J* = 9.1, 2.1 Hz, 1H), 7.55 (t, *J* = 2.1 Hz, 1H), 7.50–7.46 (m, 1H), 7.29 (t, *J* = 8.2 Hz, 1H), 6.71 (dd, *J* = 8.2, 2.1 Hz, 1H), 4.36 (s, 2H), 3.78 (s, 3H). <sup>13</sup>C NMR (125 MHz, dmsO) δ 165.40, 159.35, 157.25, 155.05, 150.74, 142.27, 140.40, 129.16, 123.99, 118.70, 115.23, 114.37, 111.41, 108.86, 107.99, 55.07, 43.64. LC-MS (m/z): [M+H]<sup>+</sup> calculated for C<sub>17</sub>H<sub>15</sub>ClN<sub>4</sub>O<sub>2</sub> 343.1; found 343.1.

## References:

1. Katzen, F. (2007) Gateway® recombinational cloning: a biological operating system, *Expert Opinion on Drug Discovery* 2, 571-589.
2. Kung, A., Chen, Y.-C., Schimpl, M., Ni, F., Zhu, J., Turner, M., Molina, H., Overman, R., and Zhang, C. (2016) Development of Specific, Irreversible Inhibitors for a Receptor Tyrosine Kinase EphB3, *Journal of the American Chemical Society* 138, 10554-10560.
3. Liu, X., Kung, A., Malinoski, B., Prakash, G. K. S., and Zhang, C. (2015) Development of Alkyne-Containing Pyrazolopyrimidines To Overcome Drug Resistance of Bcr-Abl Kinase, *Journal of Medicinal Chemistry* 58, 9228-9237.
4. Zhao, G., Li, W.-y., Chen, D., Henry, J. R., Li, H.-Y., Chen, Z., Zia-Ebrahimi, M., Bloem, L., Zhai, Y., Huss, K., Peng, S.-b., and McCann, D. J. (2011) A Novel, Selective Inhibitor of Fibroblast Growth Factor Receptors That Shows a Potent Broad Spectrum of Antitumor Activity in Several Tumor Xenograft Models, *Molecular Cancer Therapeutics* 10, 2200.
